1 **Title Page**

2 **Classification** Biological Sciences

3 **Title** Large single-locus effects for maturation timing are mediated via condition  
4 variation in Atlantic salmon

5 **Authors** Paul V Debes<sup>a</sup>, Nikolai Piavchenko<sup>a</sup>, Annukka Ruokolainen<sup>a</sup>, Outi Ovaskainen<sup>a</sup>,  
6 Jacqueline E Moustakas-Verho<sup>a</sup>, Noora Parre<sup>a</sup> Tutku Aykanat<sup>a</sup>, Jaakko Erkinaro<sup>b</sup>,  
7 Craig R Primmer<sup>a</sup>

8 **Author Affiliations** <sup>a</sup>Organismal & Evolutionary Biology Research Program / Institute of  
9 Biotechnology, University of Helsinki, Viikinkaari 9, 00014, Finland; <sup>b</sup>Natural  
10 Resources Institute Finland (Luke), Paavo Havaksen tie 3, 90014, Oulu, Finland

11 **Corresponding Author** Name: Paul V Debes; Address: Organismal & Evolutionary Biology Research  
12 Program / Institute of Biotechnology, 00014, University of Helsinki, Finland;  
13 Phone number: +358 2 9415 9537; Email: [paul.debes@dal.ca](mailto:paul.debes@dal.ca); ORCID:  
14 <https://orcid.org/0000-0003-4491-9564>

15 **Keywords** Sexual maturation, life-history evolution, lipid reserves, resource allocation trade-  
16 off, large effect locus

17 **Abstract**

18 Sexual maturation is a pivotal life-history trait that balances the probabilities between mortality and  
19 reproduction. Environmental vs. genetic contributions to maturation component traits, such as somatic  
20 growth and body condition, remain uncertain because of difficulties in determining causality. In Atlantic  
21 salmon, maturation timing associates with a large-effect locus around *vgll3*, which also links with growth,  
22 condition, and maturation in mammals. We investigate environmental vs. genetic contributions to  
23 maturation and its component traits by combining controlled breeding with common-garden  
24 experimentation in two temperatures. We test whether *vgll3* associates with first-year maturation of male  
25 salmon and, to avoid reverse causality, whether *vgll3* effects express via growth or condition in the males'  
26 non-maturing female relatives. Across 41 families, 4% of males matured in the cold vs. 39% in the warm  
27 environment. Maturation rate differed 3.3- to 4.6-fold between *vgll3* genotypes, which also explained around  
28 30% of maturation heritability. Female condition differed up to 2% between *vgll3* genotypes, which also  
29 explained 6-17% of condition heritability. Non-significant *vgll3* effects on female length were antagonistic  
30 to those for condition but of equal proportional size. When accounting for *vgll3* effects, positive genetic  
31 correlations between male maturation and female growth increased, whereas those between male  
32 maturation and condition decreased, supporting an antagonistic effect of *vgll3* on growth and condition. The  
33 results indicate that large *vgll3* effects on maturation are mediated via large condition effects and suggest  
34 *vgll3* as a candidate locus for controlling the resource allocation trade-off between somatic growth and body  
35 condition.

36 **Significance Statement**

37 Identifying traits that affect sexual maturation timing and quantifying their relative environmental and genetic  
38 importance is a major goal in evolutionary research because of their strong links to fitness. However, cause  
39 and effect between maturation timing and such traits often remain unknown. We conducted a common-  
40 garden quantitative genetic study using Atlantic salmon to test for genetic contributions of body length and  
41 body condition expressed in immature females on maturation of their male relatives. We show that the  
42 detection of genetic associations between maturation and length or condition depends on both genetic and  
43 environmental factors and suggest that the genetic association with condition chiefly underlies a candidate  
44 gene with large effect on maturation that is mediated via variation in body condition.

45 Maturation timing is a central life-history trait that contributes to maximizing individual survival and  
46 reproductive success and, thereby, per *capita* population growth rate (1-3). Maturation timing is assumed  
47 to be genetically and environmentally controlled via factors including growth or size and body condition (1-  
48 5), which may signal current energy status (6, 7). However, disentangling cause and effect is a major  
49 challenge in studies on maturation and associated traits (8-10). For example, as opposed to growth inducing  
50 maturation, ongoing maturation can temporally increase growth, as is the case for the human puberty  
51 growth spurt. Likewise, the maturation process can lower growth and condition by competing with somatic  
52 growth and depleting reserves, respectively, or affect both via appetite (4, 5, 11). Related to this problem,  
53 fundamental evolutionary knowledge on presence and relative importance of genetic vs. environmental  
54 contributions to maturation timing and their link to maturation component traits, such as growth or condition,  
55 remains limited (12-15).

56 Contrary to the assumption that life-history traits are comprised of several underlying component traits,  
57 each of which are coded by many loci with small effect on phenotypic variation (1), maturation timing in  
58 Atlantic salmon (*Salmo salar*) associates with a locus explaining a large proportion of phenotypic variation  
59 (33-39%; 16, 17). This finding not only bears implications on evolutionary predictions (1, 18) but also offers  
60 outstanding opportunities for understanding the role of age-specific body size and condition and in  
61 quantifying the relative importance of their genetic vs. environmental contributions to maturation timing. The  
62 large-effect locus positions close to a transcriptional co-factor gene (*vgll3*), hypothesized as a strong  
63 candidate gene (16, 17). Known functions of *Vgll3*, such as inhibition of adipocyte differentiation in cell lines  
64 in favor of somatic growth processes and its negative transcriptional correlation with body mass and fat  
65 content in mice (19), suggest a mechanistic link to maturation via control of resource allocation as energy  
66 reserves vs. somatic growth. Genetic markers around *vgll3* have also been associated with salmon length  
67 (16), human maturation and growth (10), body condition (20), or condition change during maturation (21),  
68 fostering the idea that the link between *vgll3* and maturation, somatic growth, and condition underlies a  
69 common functional phenotype. However, a comprehensive joint assessment of *vgll3* effects on maturation,  
70 growth, and condition, which requires that the latter two traits are estimated free of maturation-induced  
71 changes, is still missing.

72 In Atlantic salmon, sexual maturation studies have a long history (5, 22, 23) and this species offers features  
73 allowing for a joint assessment of maturation, growth, and condition, thus enabling independent assessment  
74 of their links with *vgll3*. Specifically, readily available pedigreed hatchery populations allow for planned  
75 breeding of highly fecund individuals. Many offspring with tightly connected pedigrees combined with  
76 common garden experimentation followed by quantitative genetic analyses enable i) dissection of genetic  
77 from environmental effects, ii) estimation of genetic correlations between environments or iii) estimation of  
78 genetic, environmental, and phenotypic correlations between different traits. Perhaps the biggest  
79 advantage however, is the observation that Atlantic salmon males, but usually not females, can mature  
80 during their first year (23). This provides opportunities to estimate environmental and genetic contributions  
81 to maturation in males and those to growth and condition in non-maturing females. By comparing the latter

82 to those of their male relatives (of which some may show maturation-affected traits), and genetically relating  
83 male maturation to female traits, it is possible to infer the presence and relative importance of genetic vs.  
84 environmental components of maturation timing and its maturation-unbiased component traits.

85 Here, we implemented a quantitative genetic breeding design for 42 pedigreed Atlantic salmon parents with  
86 known homozygous *vgll3* genotypes and created >5,000 offspring males and females from 41 families with  
87 all *vgll3* genotypes (**Fig. S1**). Longitudinal study of these families in a common-garden environment enabled  
88 general estimates of relative genetic vs. environmental contributions for maturation timing of first-year  
89 Atlantic salmon and its component traits in conjunction with an assessment of specific *vgll3* effects on  
90 maturation, growth, and condition. Further, we evaluated whether a known association of the *vgll3* locus  
91 with maturation (co)expresses via growth, condition, or both, by testing whether male maturation probability  
92 correlates genetically with maturation-unbiased female somatic growth or body condition, or with both, and  
93 by quantifying the *vgll3* contribution to the genetic between trait correlation. By replicating all families in two  
94 environments with a life-time 2°C water-temperature difference across a seasonal temperature curve (a  
95 likely global-warming scenario (24); **Fig. S2**), we were also able to assess environmental influences of wide  
96 relevance on our estimates.

## 97 **Results and Discussion**

98 We used a multivariate generalized animal model to test for associations between *vgll3* and each of the  
99 five investigated traits of male maturation probability (maturation, MAT), sex-specific somatic growth  
100 (length, LEN), and sex-specific body condition (condition, CON). To avoid reverse causality (i.e., inferring  
101 condition- or length-mediated *vgll3* effects on maturation that are truly maturation-mediated *vgll3* effects on  
102 somatic growth or condition) we focused on *vgll3* effects on maturation in males and length and condition  
103 in females (of which none matured). To allow for wider interpretation and relevance of our results, we report  
104 maturation results, consistent with a genetic threshold model, on the probit or observational probability  
105 scale, which are relevant for breeding-value based or phenotypic selection, respectively (25). Likewise, we  
106 report results for length and condition on the proportional scale, which is relevant to growth processes at  
107 the individual level, or on the (phenotypic standard deviation, psd) standardized effects size scale, which is  
108 relevant among individuals at the population level.

109 When fully accounting for experimental randomization and relatedness, we detected strong *vgll3* effects on  
110 maturation probability and condition, but not on length, in both temperature environments, whereby the  
111 *vgll3\*E* allele associated with both higher maturation and higher condition (**Fig. 1**). These results provide  
112 the first experimental confirmation that the allele associated with earlier maturation following marine  
113 migration (16, 17, 26) has consistent effects in males maturing in freshwater, and that the same allele also  
114 associates with a higher condition. All focal trait means were much higher in the warm than in the cold  
115 environment (**Fig. 1**; posterior temperature contrasts, 95% credible interval [95% CI]: probit scale,  $MAT_{Warm} - MAT_{Cold} = 2.0, 1.5-2.6$ ; psd scale, female  $LEN_{Warm} - LEN_{Cold} = 1.5, 1.3-1.7$ ; female  $CON_{Warm} - CON_{Cold} = 0.92, 0.57-1.29$ ). Despite these strong environmental effects on trait means, *vgll3* effect estimates did not  
118 differ between environments for any trait (**Fig. S3**).

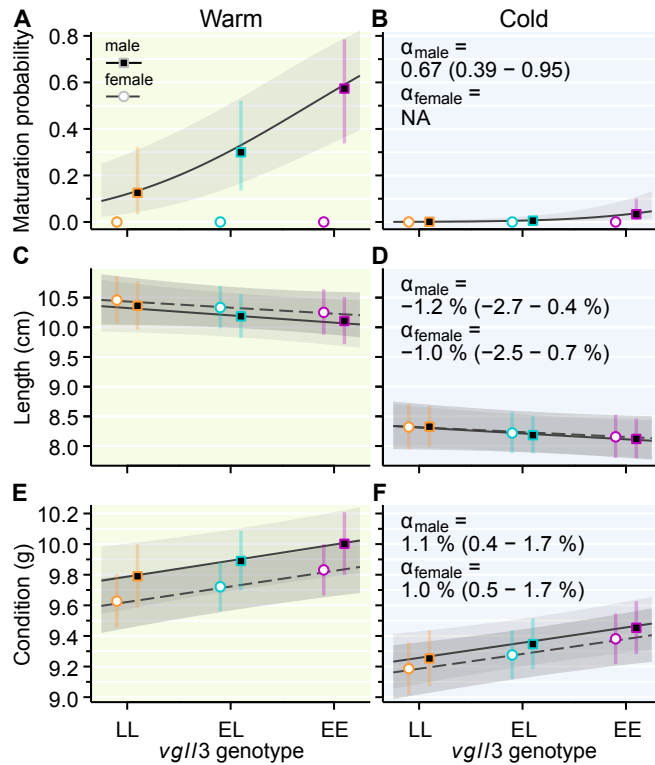

119

120 **Fig. 1. *VgII3* genotype mean estimates and additive *vgII3* effect estimates for the sex-specific responses of Atlantic salmon**  
 121 **maturation, length, and condition.** The panels show back-transformed *vgII3* genotype-specific mean estimates with 95% credible  
 122 intervals for sex-specific maturation probability (A, B, no female maturation occurred), body length (C, D), and body condition  
 123 (standardized mass for a geometric mean-sized fish of 9.1 cm, E, F) from a common multivariate generalized animal model ( $N_{\text{families}} =$   
 124 41,  $N_{\text{male}} = 2,534$ ,  $N_{\text{female}} = 2,611$ ). Estimates are shown for either a warm or cold temperature environment. Sex-specific regression  
 125 lines with 95% credible bands show additive *vgII3* effects estimates ( $\alpha$ ) that are either estimated across both temperature environments  
 126 (maturation, length, female condition) or that are estimated for each environment (male condition). Mean  $\alpha$  estimates with 95% credible  
 127 intervals are also shown. Mean *vgII3* genotype estimates and *vgII3*  $\alpha$  estimates originate from similar multivariate models differing in  
 128 whether *vgII3* effects were specified either as factorial or continuous terms, respectively.

129 We also formally tested jointly for additive ( $\alpha$ ) and dominant ( $\delta$ ) effects for all traits, because sex-specific  
 130 dominance (i.e., *vgII3*-by-sex epistasis) has been reported for sea age at maturity in one of two previous  
 131 studies (16, but see 26). We did not detect dominance for any trait (Fig. S4), which verified a condition for  
 132 meaningfully associating *vgII3* effects between male and female traits that would not be given under sex-  
 133 specific dominance. After removing all dominance effects from the model, we estimated common additive  
 134 effects for all traits across temperature environments (Fig. 1 B, D, F). For female length, we estimated a  
 135 non-significant but negative additive *vgII3*\*E allele effect on the psd scale of  $\alpha = -0.06$  (95% CI = -0.16-  
 136 0.05). This effect translates to a non-significant 1% lower body length per *vgII3*\*E allele (Fig 1 D). For female  
 137 condition, we estimated an additive *vgII3*\*E allele effect on the psd scale of  $\alpha = 0.20$  (95% CI = 0.09-0.33).  
 138 This among-individual additive *vgII3* effect on condition is much larger than that estimated for length.  
 139 However, it translates to the same proportional effect as estimated for length, but in the opposite direction.  
 140 Specifically, a non-significant 1% body length decrease per *vgII3*\*E allele is accompanied by a significant  
 141 1% body mass increase (Fig 1 F). Although the *vgII3* effect on length is non-significant and of little, if any,

142 importance at the population level (but may still represent a within-individual trade off, discussed below),  
 143 the same effect size of 1% body mass (condition) increase per *vgll3*\*E allele is very likely relevant for  
 144 maturation. Specifically, male salmon gonad development is dependent on body reserves, such as fat (4,  
 145 5), and gonads constitute 5-9% of body mass at spawning (27, 28). Thus, condition variation explained by  
 146 *vgll3* genotype may finance up to 40% of the required extra mass (ignoring unknown reserve-to-gonad  
 147 mass conversion factors). These results provide the first indication that the large effect of *vgll3* on  
 148 maturation is, at least partly, mediated by a large effect of *vgll3* on condition. We strengthen this further by  
 149 providing additional evidence below where we quantify *vgll3* effects on trait-specific heritabilities and  
 150 between-trait genetic correlations.

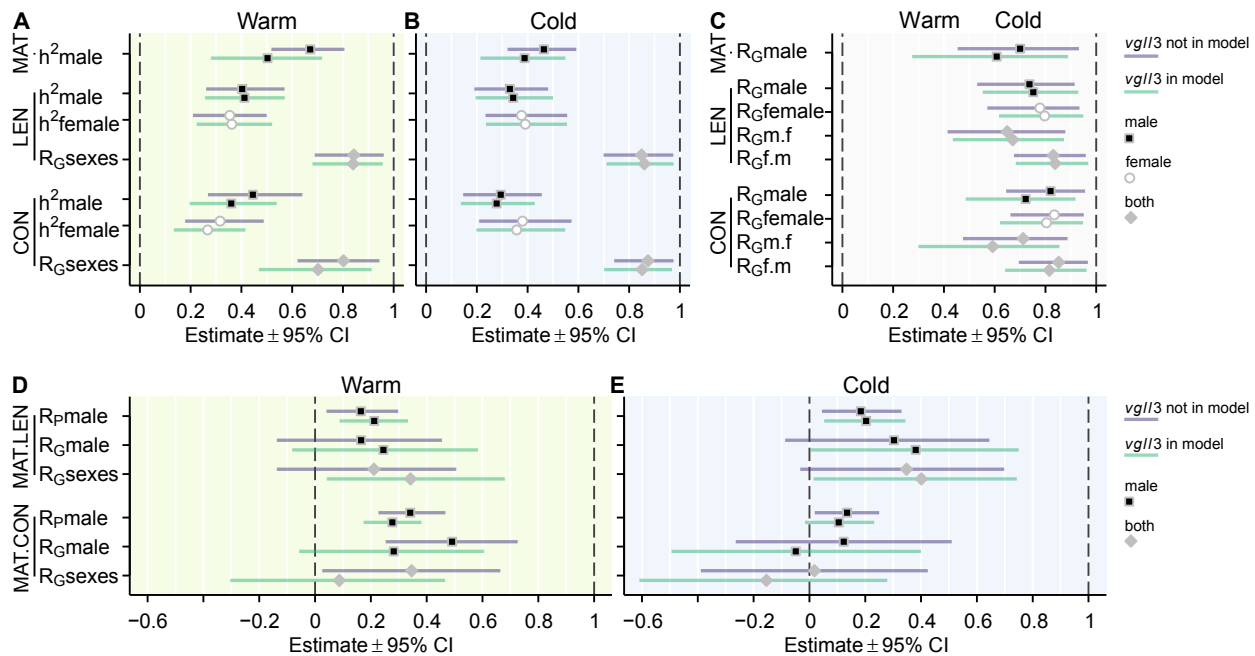

151  
 152 **Fig. 2. Heritability and genetic correlation estimates from a multivariate generalized animal mixed model, for the traits of**  
 153 **Atlantic salmon male maturation (MAT), sex-specific length (LEN), and sex-specific condition (CON).** The top row shows, for  
 154 each trait, sex-specific heritabilities ( $h^2$ ) and the sex-specific or between-sex genetic correlations ( $R_G$ ), estimated either specific for  
 155 each temperature environment (A, B) or between temperature environments (C; genetic between-environment correlations within and,  
 156 reciprocally, between sexes). The lower row shows phenotypic ( $R_P$ ) and genetic correlations ( $R_G$ ) between maturation and length  
 157 (MAT.LEN) or maturation and condition (MAT.CON) within sexes and between sexes (only for  $R_G$ ) in the warm (D) and cold (E)  
 158 environments. All estimates are depicted with 95% credible intervals. All estimates were obtained by two similar multivariate models  
 159 differing in whether additive *vgll3* effects were included or excluded as mean effects as indicated in the legends.

160 The multivariate model also enabled us to estimate environment- and trait-specific heritabilities ( $h^2$ ) and  
 161 trait-specific genetic correlations ( $R_G$ ) between temperature environments (both contribute to genotype-by-  
 162 environment interactions (29)) and also to estimate how much *vgll3* contributes to either. The heritability of  
 163 a trait quantifies the proportion of phenotypic variance explained by the sum of all underlying additive  
 164 genetic effects and predicts the response to selection. The genetic between-environment correlation  
 165 quantifies the genotype re-ranking between environments and predicts, in conjunction with heritability  
 166 estimates, the response to selection across environments (30). Fitting each model with and without mean-



167 effect specified additive *vgll3* effects, enabled us to quantify the relative genetic and phenotypic  
168 contributions of additive genetic *vgll3* effects and thus the trait-specific evolutionary importance of *vgll3*  
169 within and across environments.

170 Remarkably, male maturation heritability ( $h^2\text{MAT}$ ) on the probit scale was three times larger in the warm  
171 environment than in the 2 °C colder environment (**Fig. 2 A, B**; posterior temperature contrast, 95% CI;  
172  $h^2\text{MAT}_{\text{Warm}} - h^2\text{MAT}_{\text{Cold}} = 0.32, 0.21-0.41$ ). Translated to the observed scale, maturation heritability was four  
173 times higher in the warm environment (posterior mean, 95% CI;  $h^2\text{MAT}_{\text{Warm}} = 0.41, 0.32-0.50$ ;  $h^2\text{MAT}_{\text{Cold}} =$   
174  $0.10, 0.04-0.16$ ; posterior temperature contrast, 95% CI;  $h^2\text{MAT}_{\text{Warm}} - h^2\text{MAT}_{\text{Cold}} = 0.28, 0.17-0.38$ ). Further,  
175 the between-temperature genetic correlation estimate ( $R_G\text{MAT}$ ) for maturation was  $< 0.8$  (posterior mean,  
176 95% CI;  $R_G\text{MAT}_{\text{Warm-Cold}} = 0.70, 0.45-0.93$ ), which is somewhat lower than most previous genotype-by-  
177 temperature environment estimates for maturation of related species (29). Importantly,  $R_G < 0.8$  indicates  
178 breeding value re-ranking between environments with a mere 2°C temperature difference and thus is of  
179 relevance to natural and aquaculture settings (29, 31). This is of particular relevance, in combination with  
180 the pronounced differences in maturation heritability (30), under a 2 °C global-warming scenario (24). For  
181 maturation, additive *vgll3* effects explained 29.3 and 31.2% of the observed-scale heritability and 12.0 and  
182 10.0% of the observed-scale phenotypic variance in the warm and cold environments, respectively. On the  
183 probit scale, additive *vgll3* effects explained 29.9 and 31.9% of heritability and 13.8 and 2.9% of phenotypic  
184 variance, respectively. Additive *vgll3* effects also explained 11.4% of the between-environment genetic  
185 correlation for maturation (**Fig. 2 C**), which supports an interpretation that the abovementioned non-  
186 significant *vgll3*-by-temperature interaction effects imply environmentally stable *vgll3* effects relative to  
187 other additive genetic effects on maturation.

188 Female length heritability was, in contrast to that for maturation probability, similar between environments  
189 (posterior mean, 95% CI;  $h^2\text{LEN}_{\text{Warm}} - h^2\text{LEN}_{\text{Cold}} = -0.03, -0.19-0.13$ ) and the between-environment genetic  
190 correlation of  $R_G\text{LEN}_{\text{Warm.Cold}} = 0.78 (0.58-0.94)$  indicated only minor genotype re-ranking between  
191 environments (**Fig. 2 A, B, C**). This between-environment genetic correlation contrasts with much lower  
192 estimates in other fish species (29). Accounting for *vgll3* effects, unexpectedly, increased female length  
193 heritability, as opposed to lowering it as observed for maturation heritability, though by only 1.7 and 6.2%  
194 in the warm and cold, respectively (**Fig 2 A, B, C**). When we investigated underlying length variance  
195 components between models, we found that including *vgll3* effects re-allocated variance from the residuals  
196 to the additive genetic component, which is not expected if *vgll3* comprises additive genetic effects on  
197 length.

198 Female condition heritability was, like that for female length and in contrast to that for maturation probability,  
199 similar between environments ( $h^2\text{CON}_{\text{Warm}} - h^2\text{CON}_{\text{Cold}} = -0.09, -0.30-0.08$ ) and the between-environment  
200 genetic correlation of  $R_G\text{CON}_{\text{Warm.Cold}} = 0.84 (95\% \text{ CI} = 0.71-0.96)$  indicated very little genotype re-ranking  
201 between environments (**Fig. 2 A, B, C**). Additive *vgll3* effects explained 16.2 and 6.5% of the condition  
202 heritability and 5.2 and 2.5% of the phenotypic variance in the warm and cold environments, respectively.  
203 And, *vgll3* effects also explained 4.4% of the between-environment genetic correlation for female condition



204 **(Fig. 2 C)**, which is noticeable but less than what *vgll3* explained for maturation of the same parameter.  
205 Thus, these results support, like for maturation probability, the presence of environmentally stable *vgll3*  
206 effects, but in the presence of a relatively more environmentally stable genetic background for condition  
207 than for maturation.

208 By quantifying the proportion of the additive *vgll3* effect contribution to trait-specific heritability, we were  
209 unable to support a hypothesized *vgll3* association for male maturation via female length but support an  
210 association for male maturation via female condition. Quantitative contribution estimates of the genetic  
211 marker to the heritability were sufficiently large to consider *vgll3* a large-effect locus for both maturation and  
212 condition. Nonetheless, *vgll3* contributions to the phenotypic maturation-timing variance were smaller than  
213 previous estimates at a later life stage (16, 17, 26), which could have several biological, methodological, or  
214 statistical reasons, discussion of which goes beyond the scope of this manuscript. Furthermore, by having  
215 observed the same direction for *vgll3* effects between male maturation and female condition, we had  
216 obtained the first indication that *vgll3*-induced variation for male maturation and female condition may  
217 underlie a common *vgll3*-related molecular process. We wanted to further foster this idea by quantifying the  
218 *vgll3* contribution to the genetic correlation between male maturation and female length (MAT.LEN) and  
219 between male maturation and female condition (MAT.CON). To do so, we had borrowed quantitative  
220 genetic methodology from animal breeding (an extension of methods reviewed in 32), whose  
221 implementation through the covariance structure of the multivariate animal model was possible by our study  
222 design, and estimated the between-sex genetic correlation between different traits.

223 We did not detect genetic correlations between male maturation and female (or even male) length, although  
224 estimates in both environments were positive and the relationship-controlled phenotypic correlation  
225 estimate ( $R_p$ ) (33) between male maturation and male length was significant in both environments (**Fig 2**  
226 **D, E**). All correlation estimates (genetic and phenotypic) between male maturation and female or male  
227 length increased after accounting for *vgll3* effects (**Fig 2 D, E**). Thus, we were able to further exclude length  
228 as a mediator of *vgll3* effects on maturation, which requires inferring a positive genetic covariance among  
229 *vgll3* effects between traits, but instead found a statistical behavior that supports a negative genetic  
230 covariance among *vgll3* effects between maturation and length.

231 Between male maturation and female (and male) condition, we, however, detected a positive genetic  
232 correlation, although only in the warm environment (we discuss this environmental difference below). After  
233 accounting for *vgll3* effects, all genetic correlations between male maturation and female or male condition  
234 decreased, as is expected under scenarios of either the presence of pleiotropic *vgll3* effects on condition  
235 and maturation, or when one trait mediates the genetic-marker associated variation of the other. The  
236 decreasing effect was strongest for the genetic correlation between male maturation and female condition,  
237 which even rendered non-significant when accounting for *vgll3* effects. Ignoring a *vgll3* pleiotropy scenario,  
238 this latter result suggests a positive genetic covariance among *vgll3* effects between male maturation and  
239 female condition, which may even be dominated by *vgll3* effects and, thereby, suggests a *vgll3* effect

240 mediation on maturation via condition and not *vice versa* (because maturation variation cannot account for  
241 condition variation in immature females).

242 Although many effects for length were statistically non-significant, we cannot entirely rule out small *vgll3*  
243 effects on length. Generally, growth or length and maturation initiation are assumed to associate positively  
244 (4, 5). By inferring a negative covariance among *vgll3* effects between maturation and length we were able  
245 to rule out length mediating *vgll3* effects on maturation. However, the inferred negative genetic covariance  
246 among *vgll3* effects between maturation and length support a scenario for a *vgll3*-governed resource  
247 allocation trade-off. Such a trade-off was also, albeit weakly, indicated by the non-significant 1% length  
248 decrease per *vgll3*\*E allele that was accompanied by a significant 1% condition increase. This result is  
249 typical in life-history research for traits that represent within-individual resource allocation trade-offs in the  
250 presence of much larger among-individual variation for resource acquisition relative to the within individual  
251 resource-allocation conflict (1). The idea of a *vgll3*-mediated resource allocation trade-off also makes  
252 biological sense. This is not only because resource allocation theory predicts that energy allocated to  
253 condition cannot concurrently be allocated to growth, but also due to the suggested role of *Vgll3* in  
254 controlling mesenchymal cell fate into either adipocytes (thus increasing body condition) or bone and  
255 cartilage lineages (thus increasing somatic growth) (19). However, a final conclusion for our tentative results  
256 requires additional research.

257 A remaining question is why we detected a significant genetic correlation between male maturation and  
258 female condition in the warm, but not the cold, environment. We suspect that the higher maturation rate  
259 and higher maturation heritability in the warm provided sufficient information to detect the genetic correlation  
260 (31). In contrast, many males in the cold environment with high breeding values for condition did not mature  
261 because of the much lower average condition in the cold or due to other lower temperature-related causes,  
262 such as not exceeding growth or size thresholds needed for maturation (4, 5), masking an otherwise  
263 positive genetic correlation.

264 Extending these thoughts, we detected environmental effects on condition that were consistent with the  
265 notion that both condition and maturation covary positively with temperature. Specifically, relative to the  
266 cold environment and when translated to the proportional scale we detected a 4.6% (95% CI = 2.9-6.4%)  
267 higher female condition in the warm environment, where we had also detected a much higher maturation  
268 probability (**Fig 1 A, B, E, F**). Thus, the environmental effect of a global-warming-relevant 2°C temperature  
269 difference (24) on condition was more than twice the maximum genetic *vgll3* effect (EE vs. LL: 2%) and  
270 may have contributed considerably to the large environmental effect on maturation probability. Similar  
271 positive relationships between body condition and water temperature have previously been observed (34,  
272 35). We suspect that temperature effects on maturation via condition explain, at least partly, unexpectedly  
273 high maturation rates in heated salmon rearing facilities (36) and why effects on size and maturation timing  
274 vary between growth acceleration through increase in feed vs. temperature (37, 38). Important for  
275 consistency of natural and human selection success across temperatures (30), the large average condition  
276 temperature difference observed here was evident in the presence of both high genetic correlations (> 0.8

277 for both sexes) and similar condition heritabilities between temperatures (**Fig 2 G, H, I**). Furthermore, *vgll3*  
278 effect estimates on both female condition and on male maturation did not differ between temperature  
279 environments, and *vgll3* effects contributed to the between-environment genetic correlations for both traits.  
280 Thus, the environmental stability of *vgll3* effects on condition contributes to the environmental stability of  
281 the remaining additive genetic effects on condition.

282 These new results suggest - together with the previous results on maturation (16, 17, 26) - the presence of  
283 environmentally stable *vgll3* effects on both condition and maturation. A large share of *vgll3* effects for the  
284 positive genetic correlation between maturation and condition predicts rapid evolutionary co-responses to  
285 selection for either trait, but also predicts that their genetic correlation is sensitive to *vgll3* allele frequencies.  
286 The sex-specific results, together with previous biological knowledge on their causal association (4, 5),  
287 indicate that large *vgll3* effects on maturation are likely mediated via large condition effects and suggest  
288 *vgll3* as a candidate locus for controlling the resource allocation trade-off between somatic growth and body  
289 condition.

## 290 **Materials and Methods**

### 291 **Fish population, breeding and experimental design, data collection**

292 The experimental cohort was parented by pedigreed hatchery fish maintained by the Natural Resources  
293 Institute Finland (Laukaa, Finland). The hatchery-stock ancestors originated from the River Neva, Russia,  
294 which drains into the Baltic Sea. In November 2017, we crossed 48 parents with known *vgll3* genotype as  
295 12 2x2 factorials of unrelated *vgll3* homozygous individuals; each factorial yielded four reciprocal *vgll3*  
296 offspring genotypes (EE, EL, LE, LL; details on realized design and resulting pedigree in **Fig. S1**). We  
297 reared the experimental cohort in a recirculation system controlled for water temperature, oxygen, dissolved  
298 nitrate components, and natural light cycle, which affect growth or sexual maturation timing (4, 5). We split  
299 each family by randomizing equal number of individuals into two egg-incubator replicates (families  
300 separated; kept in darkness) and, at first feeding and after pooling incubator replicates, into eight similar  
301 tank replicates for each of two water temperatures (totaling four incubators and 16 tanks). Water  
302 temperatures followed a seasonal cycle with a 2°C difference, referred to as “warm” or “cold” (warm, range  
303 = 6.3-17.7 °C; cold, range = 4.1-16.0 °C; **Fig. S2**). Fish were fed *ad libitum* using a commercial salmon diet  
304 starting 2018-03-09 (warm) or 2018-04-27 (cold) (**Fig. S2**). Once fish size allowed passive integrated  
305 transponder tagging (warm: August 2019; cold: September 2019) to enable re-identification, we  
306 anesthetized (using methanesulfonate), fin clipped, and tagged individuals; fin clips allowed for genotyping  
307 individuals to assign family, determine molecular sex, and confirm *vgll3* genotype. Starting at tagging, we  
308 followed trajectories for fork length ( $\pm 1$  mm) and wet mass ( $\pm 0.01$  g) in 3-6-week measurement intervals  
309 until final spawning time (December 2018) when we determined maturity status by checking for extruding  
310 milt by gently pressing the abdomen and confirmed sex and maturity status in 84% of the fish by culling  
311 and dissection (N = 4,313). Once individual identification was possible, we applied a feed-restriction  
312 treatment (either *ad libitum* feeding for seven days per week or *ad libitum* feeding for two days per week  
313 with no feeding for two or three days between feedings) that was crossed with the temperature treatment

314 for a five-week period (September 2018), but we did not detect any feed-restriction effect on maturation  
315 (**Fig. S5**). Because length and condition data included in models originated from the earliest common time  
316 point, before the feed restriction, we omitted the feed restriction term from further analyses. Animal  
317 experimentation was conducted according to license ESAVI-2778-2018.

318 Genotypes and molecular sex of both parents and the experimental cohort were determined using a  
319 multiplex-PCR for 177 single nucleotide polymorphisms (SNPs) of a previously described SNP panel (39),  
320 followed by Ion Torrent (988 potential parents) or Illumina sequencing (used parents, experimental offspring  
321 cohort). Using a subset of 141 unlinked, polymorphic SNPs, we reconstructed the parents of potential  
322 parents (the experimental cohort's grandparents) with maximum likelihood (40) and assigned the  
323 experimental individuals to their parents with a likelihood approach (41). Merged information about  
324 reconstructed grandparents and assigned parents of the experimental cohort yielded a three-generation  
325 pedigree (**Fig. S1 B**) on which we based the relationship matrix utilized in animal-model analyses (42).

### 326 **Data analysis**

327 We fitted a series of uni- and multivariate general and generalized linear animal models to data for  
328 maturation binaries, assessed towards the end of spawning time in December, and length and condition  
329 records, assessed four months before spawning time in late summer. We defined condition as deviation  
330 from the (temperature-specific) slope of logarithmic mass on logarithmic length - a correlate of salmon parr  
331 lipid content (43). Length and condition data were first log-transformed, then mean-centered and variance  
332 scaled to estimate biologically meaningful proportional and phenotypic variance-standardized effects.

333 To determine the multivariate model structure and allow for comparisons between uni- or bivariate model  
334 estimates with multivariate model estimates (**Fig S7**), we first fit univariate models for the binary response  
335 of male maturation and bivariate models for the continuous responses of sex-specific length or condition.  
336 We estimated means and (co)variances for models with the binary maturation response (including the  
337 multivariate model) using Bayesian Markov Chain Monte Carlo simulations (44) with the R-package  
338 MCMCglmm (45). For the continuous responses, we initially fitted bivariate models under REML (44) using  
339 ASReml (46). We then fit the multivariate model corresponding to the chosen univariate (maturation) or  
340 bivariate models (sex-specific length or condition), and by adding the required between-trait covariances  
341 for the additive genetic effects (2,599 [males] or 5,209 [both sexes] relationship-matrix-predicted breeding  
342 values (Henderson 1973) *alias* animals), common environmental effects (16 tanks), maternal effects (21  
343 dams), and individual environmental effects including measurement error and non-additive genetic effects  
344 (2534 [males] or 5145 [both sexes] residuals). We fitted the models with probit-link function and residual  
345 variance fixed to one for maturation, corresponding to genetic threshold models (47), and with identity link  
346 function for length and condition. We did not detect maternal effects on any trait (**Fig. S6, Table S1, Table**  
347 **S2**; we removed dam effects as a consequence) and no common environmental effects on maturation (**Fig.**  
348 **S6**; we still kept the experimental tank effects), but on length and condition, which contributed up to 6 and  
349 15% to the total phenotypic variance, respectively (**Fig. S7**). We started model selection with mean-effect  
350 interactions and removed non-significant effects (**Fig. S3, S5**). Final models followed the general equation

351 (per trait), with colon indicating term interaction and variance terms in italic:  $y \sim \text{Intercept} + \text{Temperature} +$   
352  $V_{gll3} + \text{Temperature:Tank} + \text{Temperature:Animal} + \text{Temperature:Residual}$ . The  $V_{gll3}$  model term refers to  
353 either three genotypes (reciprocal heterozygote differences were absent; posterior EL-LE contrast, 95% CI:  
354  $\text{MAT}_{\text{EL}} - \text{MAT}_{\text{LE}} = 0.00, -0.47-0.49$ ), or to the additive allelic effect (we fitted both). Covariance matrices  
355 across temperatures for initially fit univariate models were diagonal for tank and residual effects and  
356 unstructured for dam and animal effects. The latter allows estimating dam- and additive genotype-by-  
357 environment effects (30). We used (co)variance priors following a  $\chi^2_1$  distribution in Bayesian univariate  
358 models (44) or priors that resulted in flat priors for heritabilities and correlations in multivariate models. We  
359 based estimates on 5,000 or 1,000 retained iterations after 50,000 burnin iterations and sampling every  
360 1,250 and 2,500 or 3,000 iterations (uni- and multivariate models, respectively). We confirmed model  
361 convergence by trace plot inspection and ensuring lag-two autocorrelation  $< 0.1$  for mean and (co)variance  
362 estimates. For the multivariate models (five response traits: sex-specific length and condition, male  
363 maturation) we expanded the covariance matrices to temperature-specific block-diagonals for  
364  $\text{Trait:Temperature:Tank}$  (two 5x5 blocks), a full  $\text{Trait:Temperature:Animal}$  genetic covariance matrix  
365 (10x10), and temperature- and sex-specific block-diagonals for  $\text{Trait:Temperature:Residual}$  (two 2x2  
366 female and two 3x3 male blocks).

367 We tested and estimated additive and dominant  $vgll3$  effects by replacing the factorial  $V_{gll3}$  term by  
368 appropriate covariates ( $\alpha$ : -1, 0, 1;  $\delta$  = 0, 1, 0). To obtain observed-scale maturation probability parameter  
369 estimates, we integrated over marginal model predictions and used methodology implemented in the R-  
370 package `QGgmm` (25), applied to each retained MCMC iteration to estimate credible intervals. We  
371 calculated genetic, environmental, and phenotypic correlations following Searle (33). All necessary data  
372 and an R-script mirroring the final uni- and multivariate modeling have been deposited in the DRYAD data  
373 repository (available during review, doi after acceptance).

#### 374 **Acknowledgments**

375 We thank S. Andrew, O. Andersson, Y. Czorlich, A. House, J. Kurko, M. Lindqvist, N. Lorenzen, O. Mehtälä,  
376 K. Mobley, S. Papakostas, V. Pritchard, K. Salminen, M. Sinclair-Waters, S. Tillanen, J.-P. Verta, and K.  
377 Zueva, for help related to gamete stripping, sample processing, tagging, phenotyping, and fish husbandry,  
378 P. de Villemereuil for multivariate modelling advice, and J. Hutchings for improving an earlier manuscript  
379 version. We acknowledge the Academy of Finland, the European Research Council, and the University of  
380 Helsinki for funding.

#### 381 **Author contributions**

382 P.V.D. and C.R.P. designed research; P.V.D., N.P., A.R., O.O., J.E.M.-V., N.P., T.A., and C.R.P. performed  
383 research; J.E. contributed salmon gametes; P.V.D. analyzed data; P.V.D. and C.R.P. wrote the paper.

384

- 385 1. Roff DA (2002) *Life History Evolution* (Sinauer Associates, Inc, Sunderland, Massachusetts) p 527.
- 386 2. Wells JCK, Nesse RM, Sear R, Johnstone RA, & Stearns SC (2017) Evolutionary public health:  
387 introducing the concept. *The Lancet* 390(10093):500-509.
- 388 3. Stearns SC (1992) *The Evolution of Life Histories* (Oxford University Press, New York) p 264.
- 389 4. Taranger GL, *et al.* (2010) Control of puberty in farmed fish. *Gen. Comp. Endocrinol.* 165(3):483-515.



- 390 5. Andersson E, Taranger GL, Wargelius A, & Schulz RW (2018) Puberty in Fish. *Encyclopedia of*  
391 *Reproduction (Second Edition)*, ed Skinner MK (Academic Press, Oxford), pp 426-429.
- 392 6. Danielsen ET, Moeller ME, & Rewitz KF (2013) Nutrient signaling and developmental timing of  
393 maturation. *Curr. Top. Dev. Biol.* 105:37-67.
- 394 7. Dupont J, Reverchon M, Bertoldo MJ, & Froment P (2014) Nutritional signals and reproduction. *Mol.*  
395 *Cell. Endocrinol.* 382(1):527-537.
- 396 8. Kause A, Ritola O, Paananen T, Mäntysaari E, & Eskelinen U (2003) Selection against early maturity in  
397 large rainbow trout *Oncorhynchus mykiss*: the quantitative genetics of sexual dimorphism and genotype-  
398 by-environment interactions. *Aquaculture* 228(1-4):53-68.
- 399 9. Bell JA, *et al.* (2018) Influence of puberty timing on adiposity and cardiometabolic traits: a Mendelian  
400 randomisation study. *PLoS Medicine* 15(8):e1002641.
- 401 10. Cousminer DL, *et al.* (2013) Genome-wide association and longitudinal analyses reveal genetic loci  
402 linking pubertal height growth, pubertal timing and childhood adiposity. *Hum. Mol. Genet.* 22(13):2735-  
403 2747.
- 404 11. Stearns SC & Koella JC (1986) The evolution of phenotypic plasticity in life-history traits: predictions of  
405 reaction norms for age and size at maturity. *Evolution* 40(5):893-913.
- 406 12. Dunlop ES, Heino M, & Dieckmann U (2009) Eco-genetic modeling of contemporary life-history  
407 evolution. *Ecol. Appl.* 19(7):1815-1834.
- 408 13. Law R (2007) Fisheries-induced evolution: present status and future directions. *Mar. Ecol. Prog. Ser.*  
409 335:271-277.
- 410 14. Enberg K, *et al.* (2012) Fishing-induced evolution of growth: concepts, mechanisms and the empirical  
411 evidence. *Mar. Ecol.* 33(1):1-25.
- 412 15. Gjedrem T & Baranski M (2005) *Selective Breeding in Aquaculture: An Introduction* (Springer, London)  
413 p 221.
- 414 16. Barson NJ, *et al.* (2015) Sex-dependent dominance at a single locus maintains variation in age at  
415 maturity in salmon. *Nature* 528(7582):405-408.
- 416 17. Ayllon F, *et al.* (2015) The *vgll3* locus controls age at maturity in wild and domesticated Atlantic salmon  
417 (*Salmo salar* L.) males. *PLoS Genet.* 11(11):e1005628.
- 418 18. Kuparinen A & Hutchings JA (2017) Genetic architecture of age at maturity can generate divergent and  
419 disruptive harvest-induced evolution. *Philos. Trans. R. Soc. Lond. B. Biol. Sci.* 372(1712).
- 420 19. Halperin DS, Pan C, Lusia AJ, & Tontonoz P (2013) Vestigial-like 3 is an inhibitor of adipocyte  
421 differentiation. *J. Lipid Res.* 54(2):473-481.
- 422 20. Nakayama K, Ohashi J, Watanabe K, Munkhtulga L, & Iwamoto S (2017) Evidence for very recent  
423 positive selection in Mongolians. *Mol. Biol. Evol.* 34(8):1936-1946.
- 424 21. Tu W, *et al.* (2015) Associations between menarche-related genetic variants and pubertal growth in male  
425 and female adolescents. *J. Adolesc. Health* 56(1):66-72.
- 426 22. Meerburg DJ (1986) *Salmonid age at maturity* (Department of Fisheries and Oceans, Ottawa) p 118.
- 427 23. Marschall EA, *et al.* (1998) A framework for understanding Atlantic salmon (*Salmo salar*) life history.  
428 *Can. J. Fish. Aquat. Sci.* 55(S1):48-58.
- 429 24. IPCC (2014) Future Climate Changes, Risk and Impacts. *Climate Change 2014: Synthesis Report.*  
430 *Contribution of Working Groups I, II and III to the Fifth Assessment Report of the Intergovernmental*  
431 *Panel on Climate Change*, eds Core Writing Team, Pachauri RK, & Meyer LA (IPCC, Geneva,  
432 Switzerland), pp 56-74.
- 433 25. de Villemereuil P, Schielzeth H, Nakagawa S, & Morrissey M (2016) General methods for evolutionary  
434 quantitative genetic inference from generalized mixed models. *Genetics* 204(3):1281-1294.
- 435 26. Ayllon F, *et al.* (2019) The influence of *vgll3* genotypes on sea age at maturity is altered in farmed mowi  
436 strain Atlantic salmon. *BMC Genet.* 20(1):44.
- 437 27. Trombley S, Mustafa A, & Schmitz M (2014) Regulation of the seasonal leptin and leptin receptor  
438 expression profile during early sexual maturation and feed restriction in male Atlantic salmon, *Salmo*  
439 *salar* L., parr. *Gen. Comp. Endocrinol.* 204:60-70.
- 440 28. Rowe DK, Thorpe JE, & Shanks AM (1991) Role of fat stores in the maturation of male Atlantic salmon  
441 (*Salmo salar*) parr. *Can. J. Fish. Aquat. Sci.* 48(3):405-413.
- 442 29. Sae-Lim P, Gjerde B, Nielsen HM, Mulder H, & Kause A (2016) A review of genotype-by-environment  
443 interaction and micro-environmental sensitivity in aquaculture species. *Rev. Aquacult.* 8(4):369-393.
- 444 30. Falconer DS (1952) The problem of environment and selection. *Am. Nat.* 86(830):293-298.

- 445 31. Robertson A (1959) The sampling variance of the genetic correlation coefficient. *Biometrics* 15(3):469-  
446 485.
- 447 32. Wolak ME, Roff DA, & Fairbairn DJ (2015) Are we underestimating the genetic variances of dimorphic  
448 traits? *Ecol. Evol.* 5(3):590-597.
- 449 33. Searle SR (1961) Phenotypic, genetic and environmental correlations. *Biometrics* 17(3):474-480.
- 450 34. Dwyer WP & Piper RG (1987) Atlantic salmon growth efficiency as affected by temperature. *Prog. Fish.*  
451 *Cult.* 49(1):57-59.
- 452 35. Tromp JJ, *et al.* (2018) Chronic exposure to increased water temperature reveals few impacts on stress  
453 physiology and growth responses in juvenile Atlantic salmon. *Aquaculture* 495:196-204.
- 454 36. Good C & Davidson J (2016) A review of factors influencing maturation of Atlantic salmon, *Salmo salar*,  
455 with focus on water recirculation aquaculture system environments. *J. World Aquacult. Soc.* 47(5):605-  
456 632.
- 457 37. Berrigan D & Charnov EL (1994) Reaction norms for age and size at maturity in response to temperature:  
458 a puzzle for life historians. *Oikos* 70(3):474.
- 459 38. Shapiro Goldberg D, van Rijn I, Kiflawi M, Belmaker J, & Heino M (2019) Decreases in length at  
460 maturation of Mediterranean fishes associated with higher sea temperatures. *ICES J. Mar. Sci.*  
461 76(4):946-959.
- 462 39. Aykanat T, Lindqvist M, Pritchard VL, & Primmer CR (2016) From population genomics to conservation  
463 and management: a workflow for targeted analysis of markers identified using genome-wide approaches  
464 in Atlantic salmon *Salmo salar*. *J. Fish Biol.* 89(6):2658-2679.
- 465 40. Jones OR & Wang J (2010) COLONY: a program for parentage and sibship inference from multilocus  
466 genotype data. *Mol. Ecol. Resour.* 10(3):551-555.
- 467 41. Anderson EC (2010) Computational algorithms and user-friendly software for parentage-based tagging  
468 of Pacific salmonids. Final report submitted to the Pacific Salmon Commission's Chinook Technical  
469 Committee (US Section). p 46.
- 470 42. Henderson CR (1973) Sire evaluation and genetic trends. *J. Anim. Sci.* 1973(Symposium):10-41.
- 471 43. Sutton SG, Bult TP, & Haedrich RL (2000) Relationships among fat weight, body weight, water weight,  
472 and condition factors in wild Atlantic salmon parr. *Trans. Am. Fish. Soc.* 129(2):527-538.
- 473 44. de Villemereuil P, Gimenez O, Doligez B, & Freckleton R (2013) Comparing parent-offspring regression  
474 with frequentist and Bayesian animal models to estimate heritability in wild populations: a simulation  
475 study for Gaussian and binary traits. *Methods Ecol. Evol.* 4(3):260-275.
- 476 45. Hadfield JD (2010) MCMC methods for multi-response generalized linear mixed models: the  
477 MCMCglmm R package. *J. Stat. Soft.* 33(2):1-22.
- 478 46. Butler DG, Cullis BR, Gilmour AR, & Gogel BJ (2009) *Mixed models for S language environments*  
479 *ASReml-R reference manual* (Queensland Department of Primary Industries and Fisheries, NSW  
480 Department of Primary Industries, Brisbane, Australia) p 144.
- 481 47. Hadfield JD & O'Hara RB (2015) Increasing the efficiency of MCMC for hierarchical phylogenetic models  
482 of categorical traits using reduced mixed models. *Methods Ecol. Evol.* 6(6):706-714.

483
